# Supplementary material
Source: MDPI journal article supplement (https://www.mdpi.com/2071-1050/11/7/1883)
Supplement: s1 [file s1]

## Supplementary Material

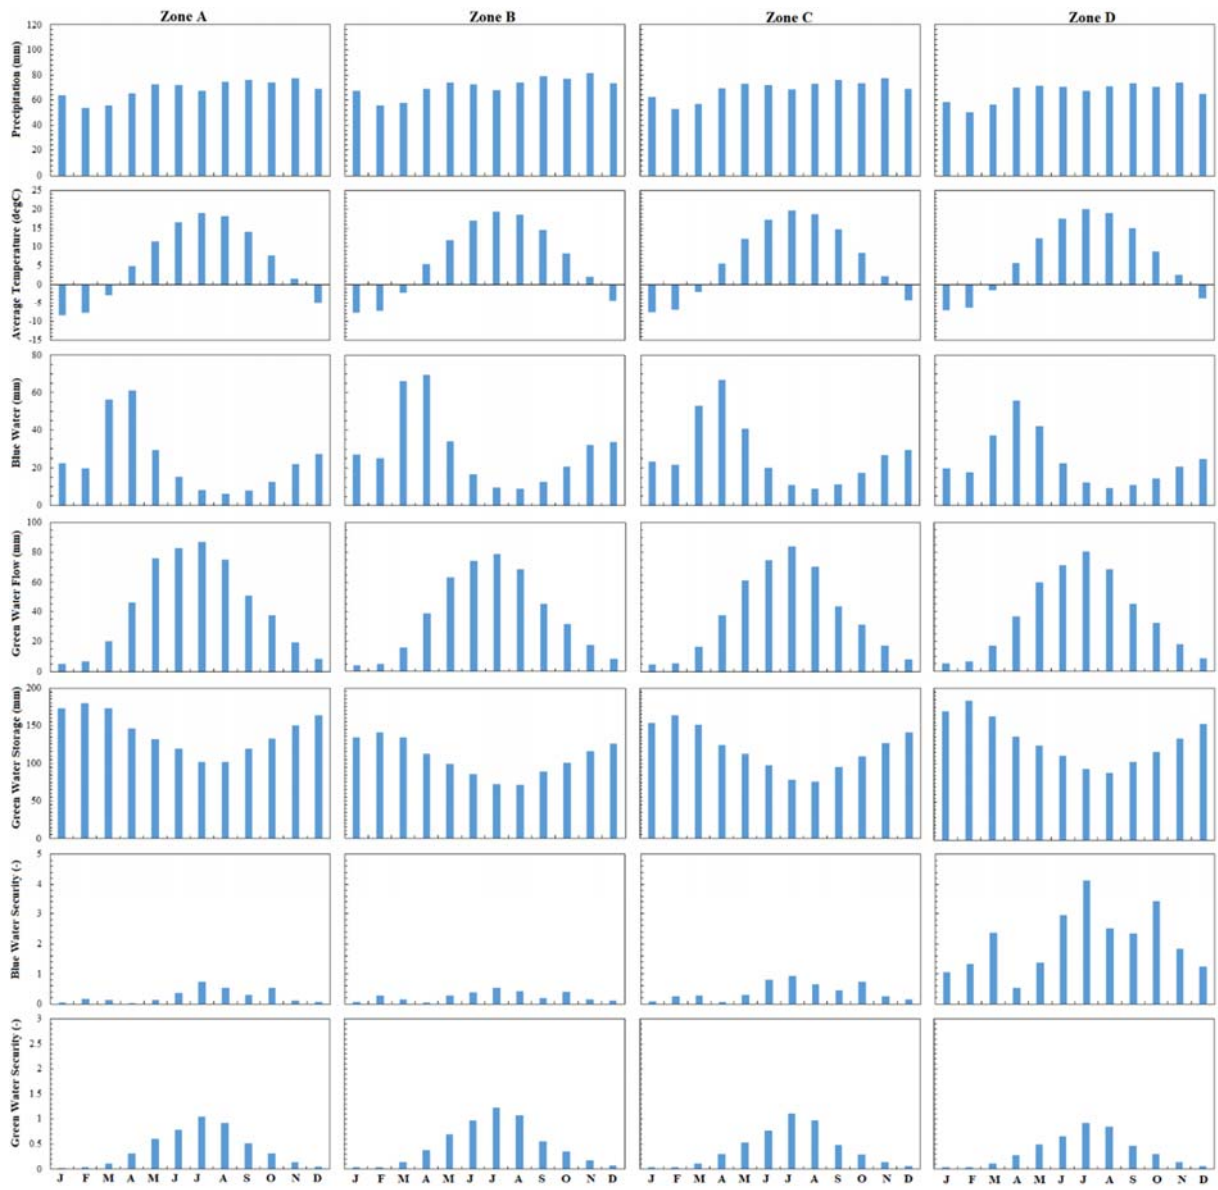

Figure S1a: Monthly variability in different water resources components in Zone A-D of the GRW (Blue water scarcity calculated using Presumptive Standards method).

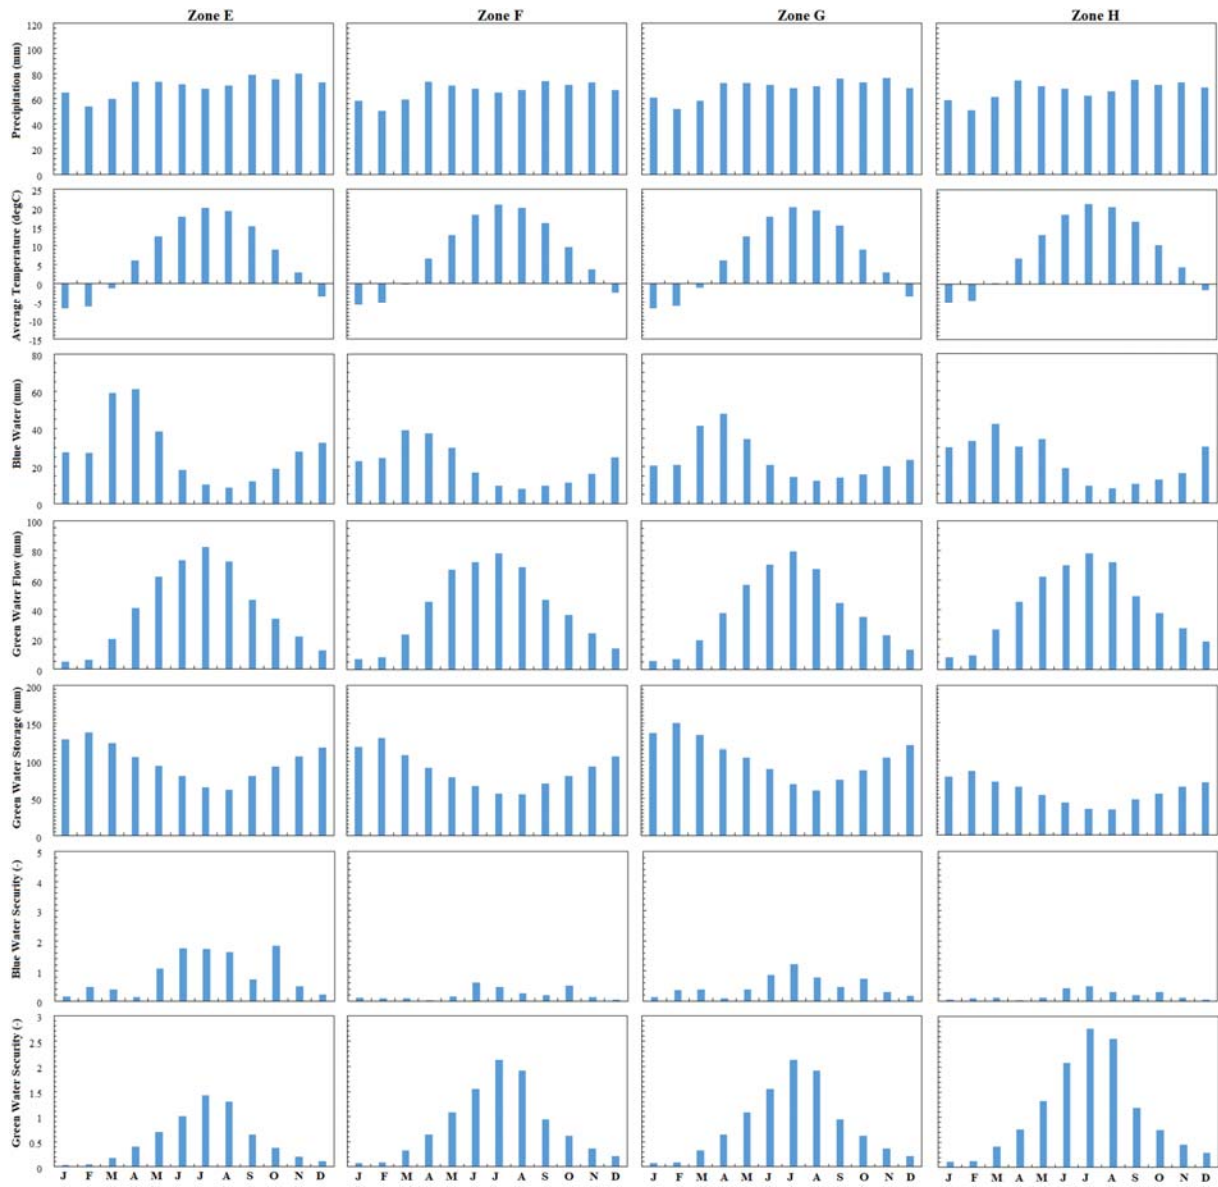

Figure S1b: Monthly variability in different water resources components in Zone E-H of the GRW (Blue water scarcity calculated using Presumptive Standards method)

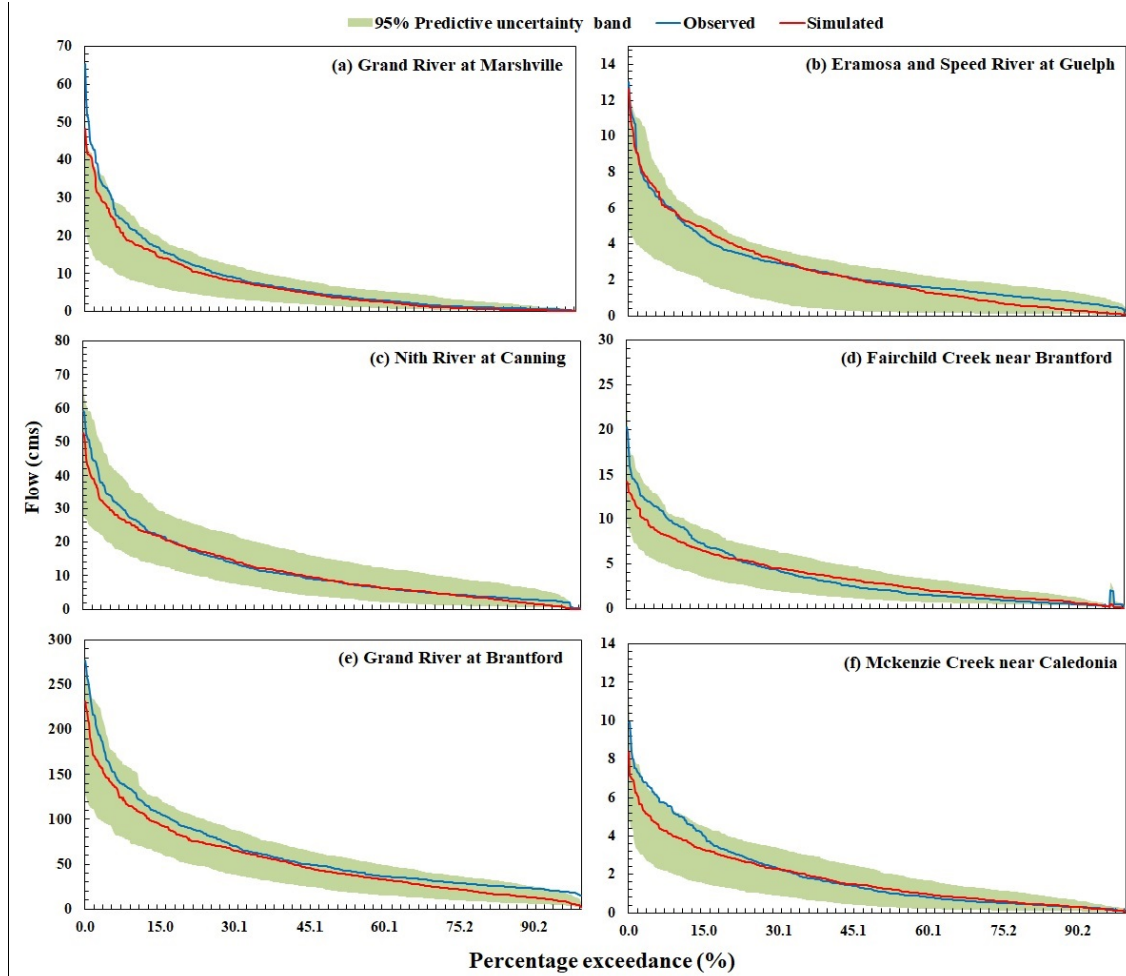

Figure S2: Flow duration curves showing the observed and simulated monthly flow for six gauging stations

Table S1: Attribution of blue water for environmental flow requirement using different methods

| Zones       | Modified $Q_{7,10}$ | Variable Monthly Flow (VMF) | Presumptive Standard |
|-------------|---------------------|-----------------------------|----------------------|
| A           | 10%                 | 36%                         | 79%                  |
| B           | 8%                  | 34%                         | 79%                  |
| C           | 14%                 | 35%                         | 80%                  |
| D           | 19%                 | 34%                         | 78%                  |
| E           | 10%                 | 35%                         | 79%                  |
| F           | 10%                 | 32%                         | 77%                  |
| G           | 14%                 | 36%                         | 80%                  |
| H           | 21%                 | 35%                         | 80%                  |
| <b>Mean</b> | <b>13%</b>          | <b>35%</b>                  | <b>79%</b>           |
| <b>Std.</b> | <b>5%</b>           | <b>2%</b>                   | <b>1%</b>            |
